# Supplementary material for: Reproductive and Developmental Effects of Sex-Specific Chronic Exposure to Dietary Arsenic in Zebrafish (Danio rerio)
Source: MDPI journal article supplement (doi:10.3390/toxics12040302), 2024-04-19

**Supplementary Table S1:** Sequences of the quantitative PCR primers used for the RT-qPCR analysis in the present study.

| S.No | Gene            | sense (5'–3')              | Antisense (5'–3')          |
|------|-----------------|----------------------------|----------------------------|
| 1    | <i>gnrh2</i>    | CAGAGGTTTCAGAGGAAGTGAAGC   | TGAGGGCATCCAGCAGTATTG      |
| 2    | <i>gnrh3</i>    | TGGAGGCAACATTCAGGATGT      | CCACCTCATTCACATATGTGTATTGG |
| 3    | <i>fsh-β</i>    | GCTGGACAATGGATCGAGTTTA     | CTCGTAGCTCTTGTACATCAAGTT   |
| 4    | <i>lh-β</i>     | GGCTGGAAATGGTGTCTTCT       | CCACCGATAACCGTCTCATTAC     |
| 5    | <i>cyp19a1b</i> | ACTAAGCAAGTCCTCCGCTGTGTACC | TTAAACATACCGATGCATTGCAGACC |
| 6    | <i>fshr</i>     | CGTCTCTTTTGTGCACTGGA       | GTGGCAATTCCACACTTCCT       |
| 7    | <i>lhr</i>      | CCTGGTCGTCTGTGCTGGTT       | AAGGCTAGATGGCACATTAGAAATC  |
| 8    | <i>cyp19a1a</i> | AGATGTCGAGTTAAAGATCCTGCA   | CGACCGGGTGAAAACGTAGA       |
| 9    | <i>sf-1</i>     | TCAGCTTGGACGTGAAGAAC       | AAC TTGTCTGTCTGCTGAGG      |
| 10   | <i>17β-hsd</i>  | ACATTCACGGCTGAGGAGTTT      | ATGCTGCCATACGTTTGCTC       |
| 11   | <i>vtg</i>      | AGATCGGTACTTGGCACACC       | TGTCGTTTTTCAGCAATGGAG      |
| 12   | <i>er-α</i>     | GGTCCAGTGTGGTGTCTCT        | CACACGACCAGACTCCGTAA       |
| 13   | <i>β-actin</i>  | AGGTCATCACCATTGGCAAT       | GATGTCCACGTCGCACTTCAT      |

**Supplementary Figure S1.** Representative photographs of morphological deformities observed in the zebrafish larvae produced by the breeding of arsenic-exposed females and control males, and arsenic-exposed males and control females.

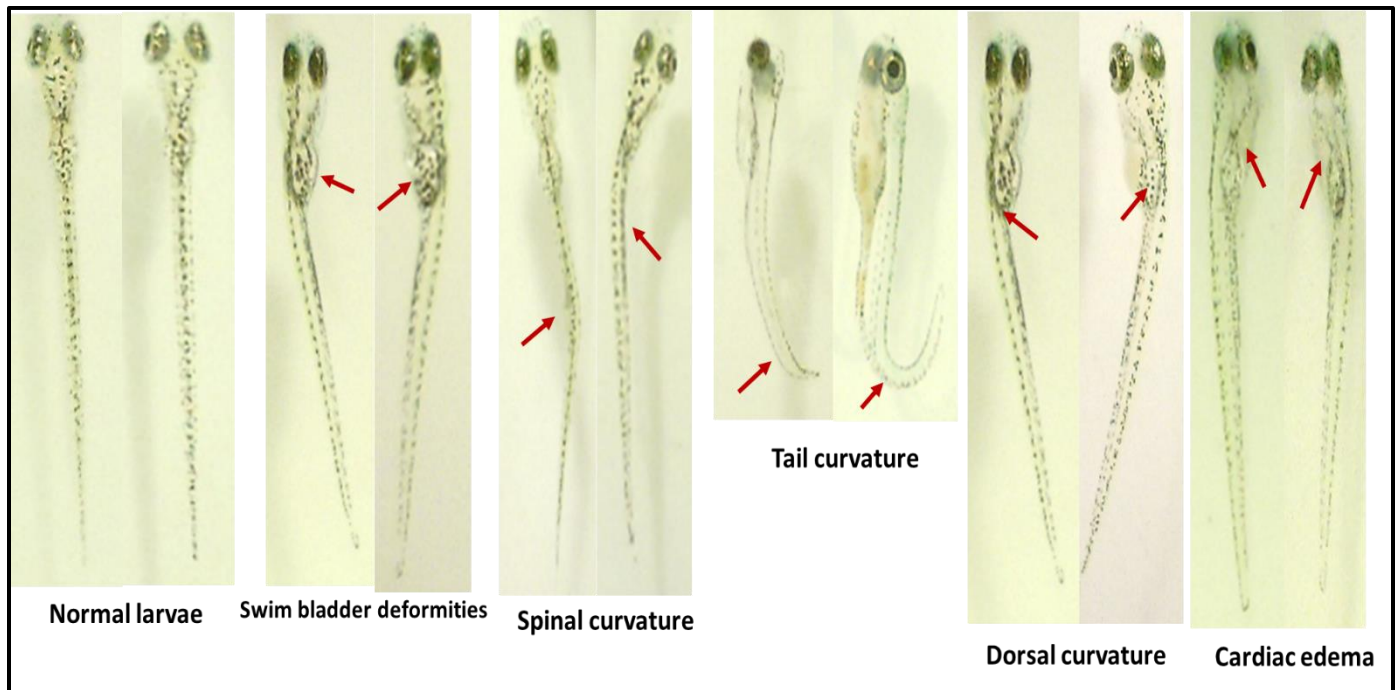

Supplement: s1 [file s1]
